# Supplementary material
Source: PubMed Central journal article supplement (PMC6825563)
Supplement: NIHMS1537536-supplement-1.pdf [file NIHMS1537536-supplement-1.pdf]

A. **SUM-190 Clonogenic Survival Assay**

| Treatment   | Enhancement Ratio | Cytotoxicity    |
|-------------|-------------------|-----------------|
| DMSO        | 1.0               | 1.0             |
| 0.5 $\mu$ M | 1.25 $\pm$ 0.06   | 0.77 $\pm$ 0.02 |
| 1 $\mu$ M   | 1.45 $\pm$ 0.03   | 0.62 $\pm$ 0.13 |
| 2 $\mu$ M   | 1.64 $\pm$ 0.21   | 0.63 $\pm$ 0.10 |

B. **MDA-IBC-3 Clonogenic Survival Assay**

| Treatment   | Enhancement Ratio | Cytotoxicity    |
|-------------|-------------------|-----------------|
| DMSO        | 1.0               | 1.0             |
| 0.5 $\mu$ M | 1.20 $\pm$ 0.39   | 0.61 $\pm$ 0.39 |
| 1 $\mu$ M   | 1.12 $\pm$ 0.08   | 0.46 $\pm$ 0.27 |
| 2 $\mu$ M   | 1.28 $\pm$ 0.06   | 0.43 $\pm$ 0.31 |

C. **SUM-149 Clonogenic Survival Assay**

| Treatment | Enhancement Ratio | Cytotoxicity    |
|-----------|-------------------|-----------------|
| DMSO      | 1.0               | 1.0             |
| 2 nM      | 1.22 $\pm$ 0.05   | 0.82 $\pm$ 0.23 |
| 10 nM     | 1.42 $\pm$ 0.01   | 0.49 $\pm$ 0.24 |
| 20 nM     | 1.76 $\pm$ 0.11   | 0.39 $\pm$ 0.23 |

**Supplemental Figure 1: Enhancement ratios and toxicity for IBC clonogenic survival assays.**

Average radiation enhancement ratio (rER) and toxicity values are shown for each treatment in SUM-190 (A), MDA-IBC-3 (B), and SUM-149 (C) cells.
