# Supplementary material
Source: PubMed Central journal article supplement (PMC6825563)
Supplement: NIHMS1537536-supplement-2.pdf [file NIHMS1537536-supplement-2.pdf]

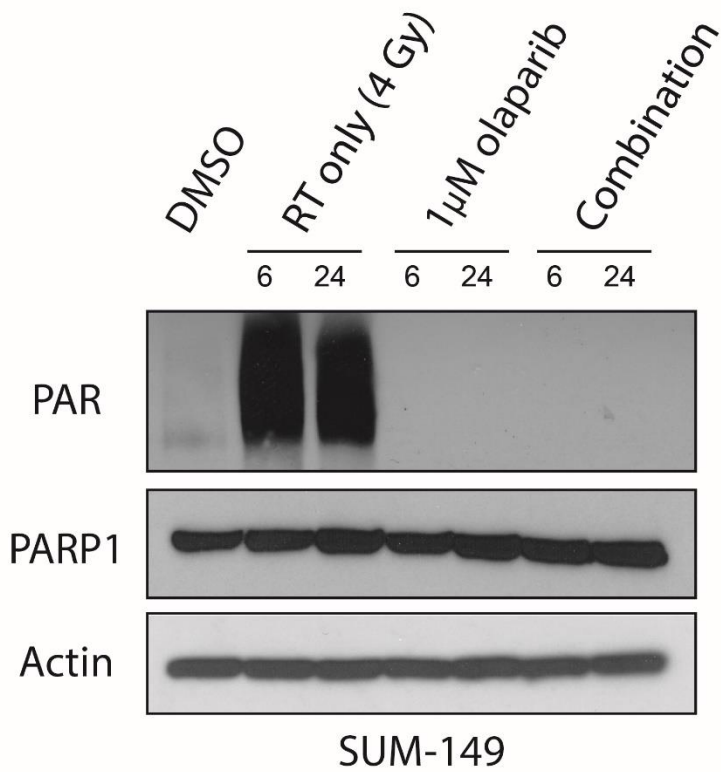

**Supplemental Figure 2: Higher doses of olaparib are sufficient to inhibit PAR formation in *BRCA1*-mutant SUM-149 cells.** At higher concentrations of olaparib (1 μM), combination treatment of PARP1 inhibition and radiation decreases PAR in a comparable manner to lower doses of olaparib (20nM) in SUM-149 cells.
