# Supplementary material
Source: PubMed Central journal article supplement (PMC6825563)
Supplement: NIHMS1537536-supplement-3.pdf [file NIHMS1537536-supplement-3.pdf]

| Ab          | Company | Cat #    | Source        | Clone    | Dilution | Epitope retrieval | Detection | Control Tissue   |
|-------------|---------|----------|---------------|----------|----------|-------------------|-----------|------------------|
| Ki67        | AbCam   | Ab16667  | Rabbit MonoAb | SP-6     | 1:250    | pH6 HIER          | Env+      | Tonsil           |
| p16 (INK4a) | AbCam   | Ab108349 | Rabbit MonoAb | EPR1473  | 1:2000   | pH6 HIER          | Env+      | Kidney           |
| PARP1       | AbCam   | Ab191217 | Rabbit MonoAb | EPR18461 | 1:1000   | pH6 HIER          | Env+      | HeLa cell pellet |
| PAR         | AbCam   | Ab14460  | Chicken       |          | 1:500    | pH6 HIER          | LSAB+     | Pancreas         |

HIER: Heat induced epitope retrieval

LSAB+: Liquid streptavidin Biotin

Env+: Envision+ Polymer HRP Second antibody

**Supplemental Table 1: Extended methods for immunohistochemistry.** Antibodies used in immunohistochemistry experiments are listed with each of the corresponding dilutions, retrieval techniques, and positive controls.
