# Supplementary material
Source: PubMed Central journal article supplement (PMC6825563)
Supplement: NIHMS1537536-supplement-4.pdf [file NIHMS1537536-supplement-4.pdf]

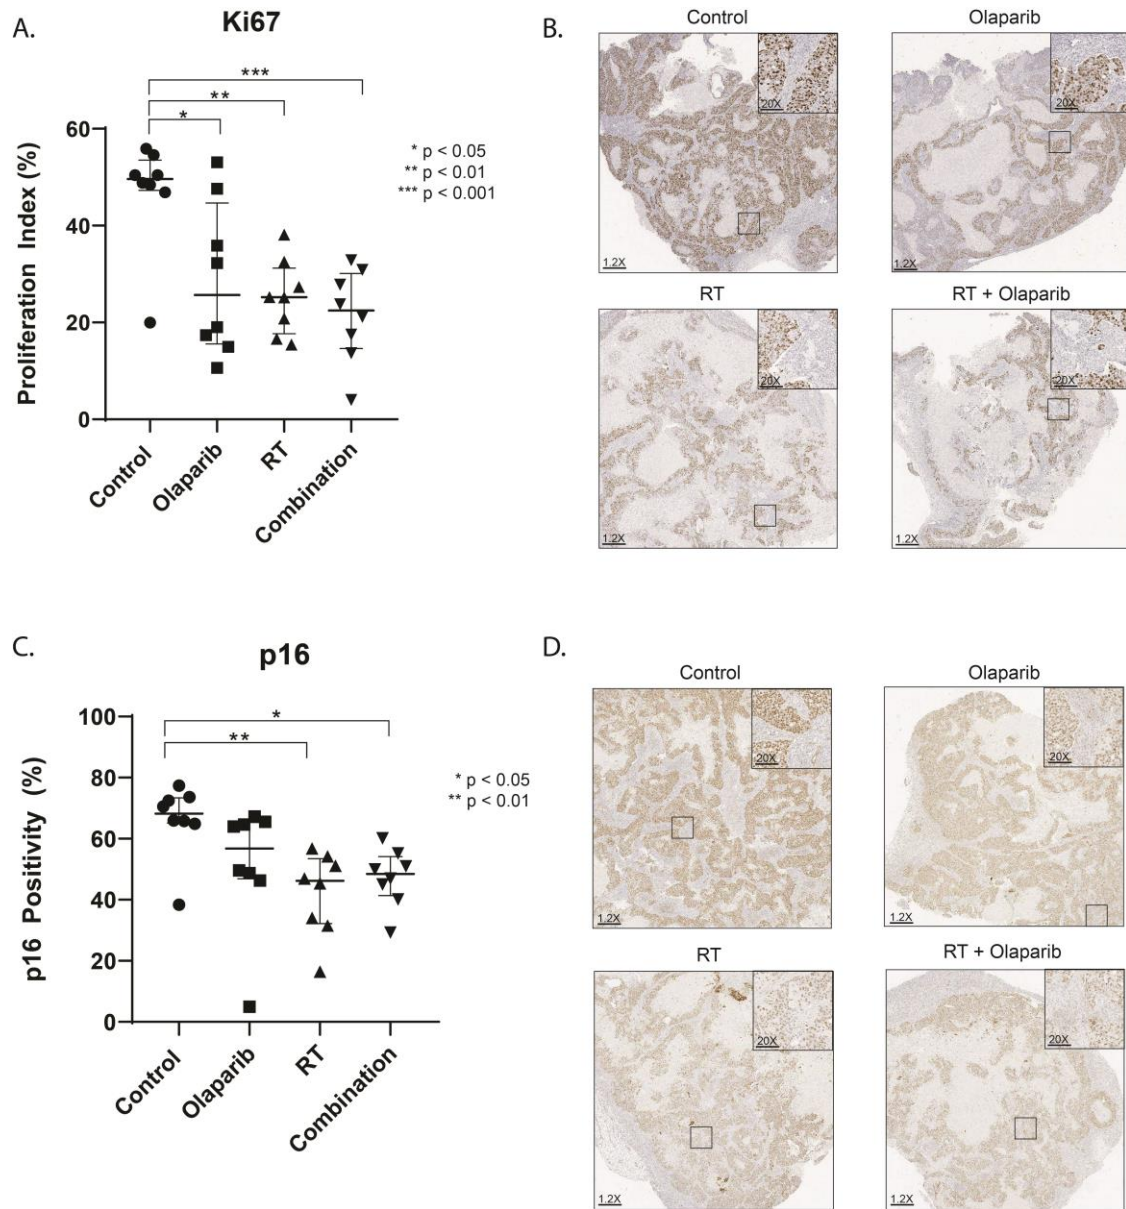

**Supplemental Figure 3: Ki67 and p16 levels are decreased in tumors from animals treated with radiation and combination PARP-inhibitor and radiation.** SUM-190 xenograft tumors that were harvested from mice at the completion of the long-term *in vivo* study. Protein expression levels were assessed by immunohistochemical staining. Levels of Ki67, a marker of proliferation, are significantly decreased in all treatment groups (A), and p16 levels are significantly decreased in the RT-alone and combination treated groups (B). Representative images from each group are shown (C,D). (\*  $p < 0.05$ , \*\*  $p < 0.01$ , \*\*\*  $p < 0.001$ )
