# Supplementary material
Source: PubMed Central journal article supplement (PMC6825563)
Supplement: NIHMS1537536-supplement-5.pdf [file NIHMS1537536-supplement-5.pdf]

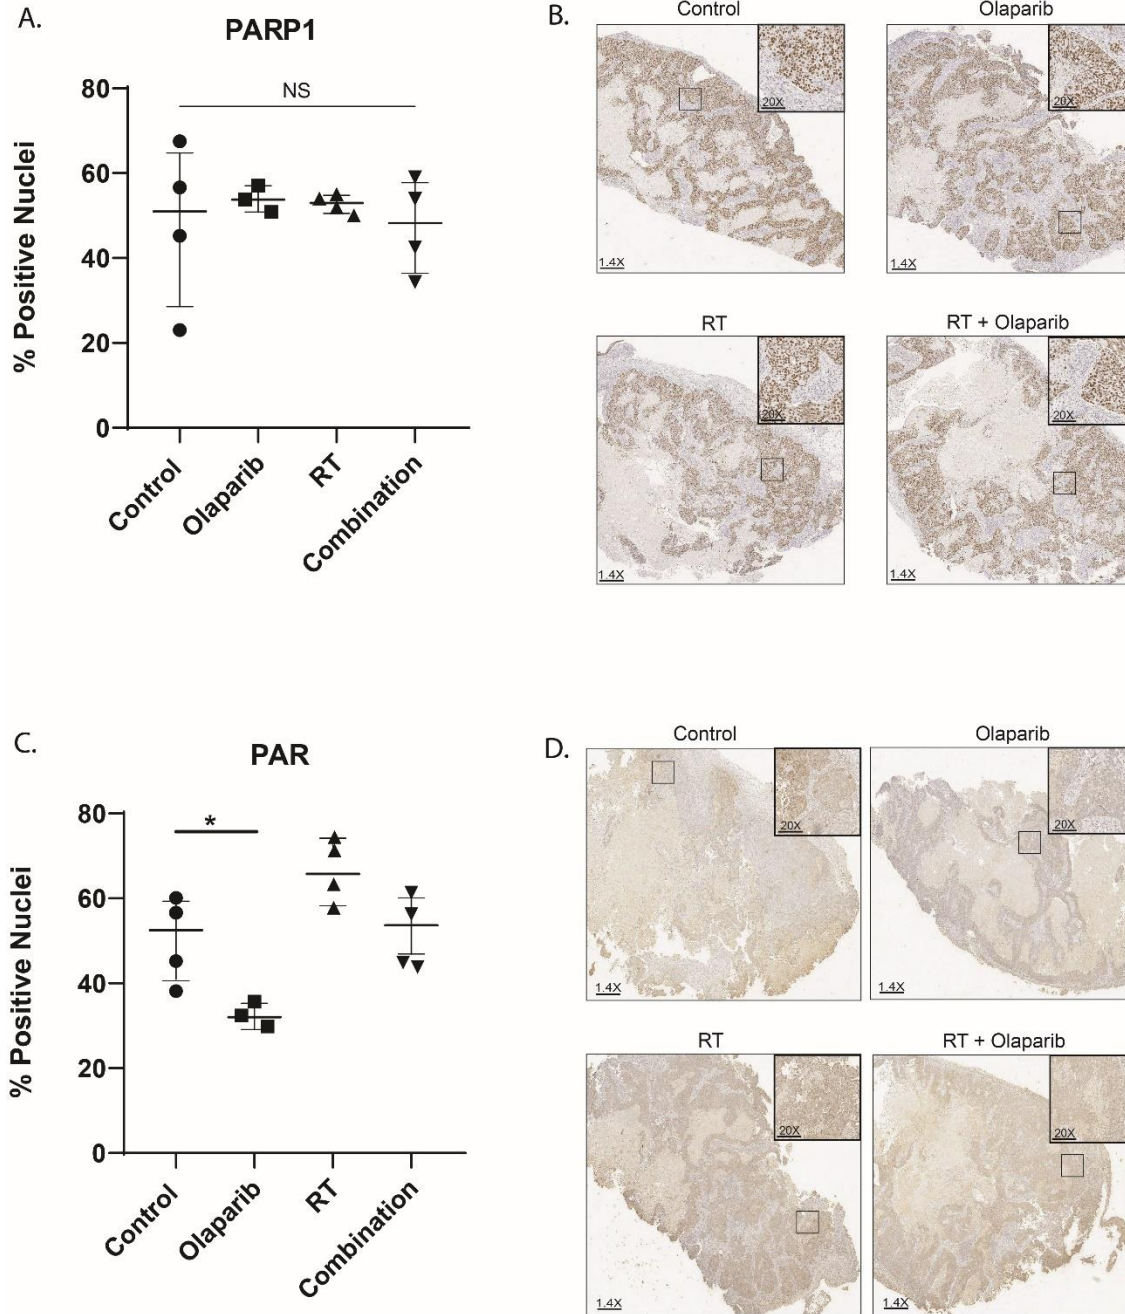

**Supplemental Figure 4: Total PARP1 levels do not change with treatment but PAR levels are decreased by PARPi.** Total levels of PARP1 were assessed in tumors from mice treated with olaparib. Olaparib treatment did not affect PARP1 protein expression by IHC in olaparib-alone, RT alone, or combination treated animals (A). Representative images of PARP1 staining are shown for all treatment conditions (B). PAR levels were, however, significantly decreased in the animals treated with olaparib alone (C). Representative images of PAR staining are shown for all treatment conditions (D). (NS: not significant, \*  $p < 0.05$ )
